# Supplementary material
Source: publisher figshare collection journal article supplement (https://diabetesjournals.figshare.com/ndownloader/files/34343225)
Supplement: Supplementary file 1 [file 34343225]

## Sheet: Sheet1
Supplemental Table 3: Primer sequences used in qPCR.
Target gene	Forward	Reverse
mKmt2a	CGATGACAACCGACAGTGTGCA	GCTGACCACAAAGCACAGTTCAC
mKmt2b	GGAAGCCAGATGAAAGGACTCC	TGGTCCAAGGATGGAGGCAACA
mKmt2c	CCTATCCTCCAGAGGTTGCTGG	TTTGCTGAGGCACATGGAAGCG
mKmt2d	CACTATAAACGGCCCCATACC	TGACTTGGAGTGCACAAACTG
mKmt2e	GACCATCACAGGGTTTGTGG	CTATGCTCATGACGTTCGCC
mSetd1a	CCAGGAGTCTTCCTCAGAGAAG	GACGAGTCACTGTCCTCATCCT
mSetd1b	GACACCAAAGGGGAAACTCG	GTCTCGCTCACAATCGGAGA
